# Supplementary material for: Correlation between Oral Health-Related Quality of Life and Objectively Measured Oral Health in People with Ehlers–Danlos Syndromes
Source: MDPI journal article supplement (doi:10.3390/ijerph17218243), 2020-11-08
Supplement: s1 [file s1]

**Table S3.** Overview of each Participant with corresponding age, sex, OHIP- and PhOX-Score

| Patient ID | Sex <sup>1</sup> | Age | OHIP Score | PhOX Score |
|------------|------------------|-----|------------|------------|
| 1          | W                | 58  | 37         | 79         |
| 2          | W                | 77  | 17         | 76         |
| 3          | W                | 53  | 10         | 69         |
| 4          | W                | 61  | 24         | 66         |
| 5          | W                | 70  | 23         | 65         |
| 6          | W                | 42  | 20         | 64         |
| 7          | W                | 53  | 33         | 67         |
| 8          | W                | 58  | 13         | 59         |
| 9          | W                | 40  | 10         | 75         |
| 10         | W                | 47  | 21         | 70         |
| 11         | W                | 45  | 13         | 66         |
| 12         | W                | 53  | 29         | 73         |
| 13         | W                | 43  | 38         | 81         |
| 14         | W                | 59  | 18         | 72         |
| 15         | W                | 30  | 17         | 74         |
| 16         | W                | 39  | 8          | 83         |
| 17         | W                | 59  | 42         | 42         |
| 18         | W                | 38  | 13         | 76         |
| 19         | W                | 39  | 4          | 76         |
| 20         | W                | 37  | 7          | 73         |
| 21         | W                | 32  | 17         | 72         |
| 22         | W                | 25  | 9          | 88         |
| 23         | W                | 22  | 2          | 83         |
| 24         | M                | 24  | 6          | 91         |
| 25         | W                | 64  | 12         | 57         |
| 26         | M                | 46  | 0          | 74         |

|    |   |    |    |    |
|----|---|----|----|----|
| 27 | W | 82 | 16 | 54 |
| 28 | W | 47 | 14 | 69 |
| 29 | W | 45 | 33 | 64 |
| 30 | W | 20 | 6  | 86 |
| 31 | M | 50 | 3  | 70 |
| 32 | W | 33 | 24 | 87 |
| 33 | W | 22 | 26 | 79 |
| 34 | W | 37 | 33 | 58 |
| 35 | W | 29 | 42 | 80 |
| 36 | W | 36 | 31 | 76 |
| 37 | W | 51 | 28 | 38 |
| 38 | W | 25 | 13 | 71 |
| 39 | W | 19 | 36 | 81 |
| 40 | W | 24 | 13 | 84 |
| 41 | W | 37 | 40 | 79 |
| 42 | W | 33 | 33 | 58 |
| 43 | M | 39 | 35 | 63 |
| 44 | W | 47 | 2  | 55 |
| 45 | W | 20 | 2  | 87 |
| 46 | W | 21 | 7  | 83 |
