# Supplementary material for: Correlation between Oral Health-Related Quality of Life and Objectively Measured Oral Health in People with Ehlers–Danlos Syndromes
Source: MDPI journal article supplement (doi:10.3390/ijerph17218243), 2020-11-08
Supplement: s1 [file s1]

Datum: \_\_\_\_\_

Patienten ID: \_\_\_\_\_

**A Selbstangaben**

„Wie oft hatten Sie in den letzten 30 Tagen im Mund-, Kiefer oder Gesichtsbereich ...?“

Schmerzen:

- ☐ nie  
☐ selten (ca. 1x im Monat)  
☐ ab und zu (mehrfach pro Monat)  
☐ oft (mehrfach pro Woche)  
☐ sehr oft (täglich)

 Missempfindungen:  
 (Brennen, Taubheitsgefühl, Hypersensitivitäten,  
 Geschmacksveränderungen etc.)

- ☐ nie  
☐ selten (ca. 1x im Monat)  
☐ ab und zu (mehrfach pro Monat)  
☐ oft (mehrfach pro Woche)  
☐ sehr oft (täglich)

**B Extraoraler Befund**
 Druckdolenz:  
 (M. temporalis, M. masseter, Kiefergelenk,  
 Gl. parotis, Gl. submandibularis)

- ☐ nein ☐ ja → *Intensität und Bekanntheit*  
 Intensität ☐ leicht  
☐ mäßig  
☐ stark  
 Bekanntheit: ☐ unbekannt  
☐ bekannt

**C Intraoraler Befund**

|    |    |    |    |    |    |    |    |    |    |    |    |    |    |    |    |
|----|----|----|----|----|----|----|----|----|----|----|----|----|----|----|----|
| 18 | 17 | 16 | 15 | 14 | 13 | 12 | 11 | 21 | 22 | 23 | 24 | 25 | 26 | 27 | 28 |
|    |    |    |    |    |    |    |    |    |    |    |    |    |    |    |    |
|    |    |    |    |    |    |    |    |    |    |    |    |    |    |    |    |
| 48 | 47 | 46 | 45 | 44 | 43 | 42 | 41 | 31 | 32 | 33 | 34 | 35 | 36 | 37 | 38 |

**Legende:** S = gesund, kein Behandlungsbedarf  
 F = gefüllte, überkronte Zähne (auch implantatgetragene Kronen)  
 D = kariöse, defekte Zähne  
 R = ersetzte Zähne (Brückenglied/ Prothesenzahn)  
 M = fehlende Zähne (Lücke)  
 )( = Lückenschluss

Anzahl Zähne gesund: **S** \_\_\_\_\_ [0-28]Anzahl Zähne gefüllt: **F** \_\_\_\_\_ [0-28]Anzahl Zähne defekt: **D** \_\_\_\_\_ [0-28]Anzahl Zähne gesamt: **S + F + D + )(** \_\_\_\_\_ [0-28]

Anzahl Zähne Sondierungstiefe 3,5 - 5,5 mm: \_\_\_\_\_ [0-6]

Anzahl Zähne Sondierungstiefe &gt; 5,5 mm: \_\_\_\_\_ [0-6]

Blutung bei Sondierung: ☐ nein ☐ ja

Anzahl perkussionsempfindliche Zähne: \_\_\_\_\_ [0-28]

**Info:** Ramfjord Zähne: 16, 21,  
 24, 36, 41, 44

|                                                       |                                                                                                                                                                                                                                                                                                                                                                                        |                             |
|-------------------------------------------------------|----------------------------------------------------------------------------------------------------------------------------------------------------------------------------------------------------------------------------------------------------------------------------------------------------------------------------------------------------------------------------------------|-----------------------------|
| Anzahl der Stützzonen:                                | _____ [0-4]                                                                                                                                                                                                                                                                                                                                                                            | <b>Info:</b> mit Zahnersatz |
| Overjet (sagittaler Überbiss):                        | _____ mm                                                                                                                                                                                                                                                                                                                                                                               | <b>Info:</b> mit Zahnersatz |
| Overbite (vertikaler Überbiss):                       | _____ mm                                                                                                                                                                                                                                                                                                                                                                               |                             |
| Größte Kontaktpunktabweichung:                        | _____ mm                                                                                                                                                                                                                                                                                                                                                                               |                             |
| Seitlicher Kreuzbiss:                                 | <input type="checkbox"/> nein <input type="checkbox"/> ja                                                                                                                                                                                                                                                                                                                              |                             |
| Mundöffnungsbewegung:                                 | <input type="checkbox"/> gerade<br><input type="checkbox"/> nicht gerade                                                                                                                                                                                                                                                                                                               | <b>Info:</b> mit Zahnersatz |
| max. aktive Mundöffnung:                              | _____ mm                                                                                                                                                                                                                                                                                                                                                                               |                             |
| max. passive Mundöffnung:                             | _____ mm                                                                                                                                                                                                                                                                                                                                                                               |                             |
| Spalten oder Defekte:                                 | <input type="checkbox"/> keine<br><input type="checkbox"/> operierte Spalte ohne Defekt<br><input type="checkbox"/> nur im Weichgewebe<br><input type="checkbox"/> knöcherner Defekt ohne MAV<br><input type="checkbox"/> knöcherner Defekt mit MAV                                                                                                                                    |                             |
| Befeuchtung:<br>(Mundschleimhäute/Lippe/Zunge)        | <input type="checkbox"/> feucht<br><input type="checkbox"/> partiell trocken<br><input type="checkbox"/> komplett trocken                                                                                                                                                                                                                                                              |                             |
| Speichelskonsistenz:                                  | <input type="checkbox"/> flüssig<br><input type="checkbox"/> leicht schaumig<br><input type="checkbox"/> kein Speichel                                                                                                                                                                                                                                                                 |                             |
| Schwellung:<br>(Mundschleimhäute/Lippe/Zunge)         | <input type="checkbox"/> nein <input type="checkbox"/> ja → <i>Fläche und Intensität</i><br>Fläche: <input type="checkbox"/> max. ¼ der Oberfläche<br><input type="checkbox"/> max. ½ der Oberfläche<br><input type="checkbox"/> über ½ der Oberfläche<br><input type="checkbox"/> gesamte Oberfläche<br>Intensität: <input type="checkbox"/> leicht<br><input type="checkbox"/> stark |                             |
| Verfärbung:<br>(Mundschleimhäute/Lippe/Zunge)         | <input type="checkbox"/> nein <input type="checkbox"/> ja → <i>Fläche und Intensität</i><br>Fläche: <input type="checkbox"/> max. ¼ der Oberfläche<br><input type="checkbox"/> max. ½ der Oberfläche<br><input type="checkbox"/> über ½ der Oberfläche<br><input type="checkbox"/> gesamte Oberfläche<br>Intensität: <input type="checkbox"/> leicht<br><input type="checkbox"/> stark |                             |
| Integritätsverlust:<br>(Mundschleimhäute/Lippe/Zunge) | <input type="checkbox"/> nein <input type="checkbox"/> ja → <i>Fläche und Intensität</i><br>Fläche: <input type="checkbox"/> max. ¼ der Oberfläche<br><input type="checkbox"/> max. ½ der Oberfläche<br><input type="checkbox"/> über ½ der Oberfläche<br><input type="checkbox"/> gesamte Oberfläche<br>Intensität: <input type="checkbox"/> leicht<br><input type="checkbox"/> stark |                             |
